# Supplementary material
Source: Research Square preprint supplement (doi:10.21203/rs.3.rs-10231354/v1)
Supplement: Supplementary file 1 [file 7d3812ba7f4f81b82a5b3c76.docx]

**Table 1**

*Kinematic brain injury metric equations*

| **Metric** | **Equation** | **Reference** |
| --- | --- | --- |
| GSI |  | Gadd (1966)[50] |
| HIC |  | Versace (1971)[51] |
| GAMBIT |  | Newman (1986)[53] |
| HIP |  | Newman & Shewchenko (2000)[52] |
| BrIC |  | Takhounts et al. (2013)[54] |
| UBrIC |  | Gabler et al. (2018)[55] |
| DAMAGE |  | Gabler et al. (2019)[38] |
